# Supplementary material
Source: PubMed Central journal article supplement (PMC6386190)
Supplement: NIHMS1004169-supplement-suppl.pdf [file NIHMS1004169-supplement-suppl.pdf]

**SUPPLEMENTARY TABLES**

**Supplementary Table 1.** Treatment-emergent grade 3/4 adverse events in the safety population (n=116)

| <b>Adverse Event, n (%)</b>               | <b>MEDI3617<br/>monotherapy<br/>total<br/>(n=42)</b> | <b>MEDI3617 +<br/>bevacizumab<br/>Q3W<br/>escalation<br/>total<br/>(n=16)</b> | <b>MEDI3617 +<br/>bevacizumab<br/>Q2W total<br/>(n=38)</b> | <b>MEDI3617 +<br/>paclitaxel<br/>total<br/>(n=13)</b> | <b>MEDI3617 +<br/>carboplatin/<br/>paclitaxel<br/>total<br/>(n=7)</b> |
|-------------------------------------------|------------------------------------------------------|-------------------------------------------------------------------------------|------------------------------------------------------------|-------------------------------------------------------|-----------------------------------------------------------------------|
| Any grade ≥3 adverse event (no. patients) | 21 (50)                                              | 8 (50)                                                                        | 22 (57)                                                    | 5 (39)                                                | 5 (71)                                                                |
| Pleural effusion                          | 3 (7)                                                | 1 (6)                                                                         | 0                                                          | 0                                                     | 0                                                                     |
| Small intestinal obstruction              | 3 (7)                                                | 0                                                                             | 1 (3)                                                      | 0                                                     | 0                                                                     |
| Hypertension                              | 2 (5)                                                | 5 (31)                                                                        | 2 (5)                                                      | 0                                                     | 0                                                                     |
| Fatigue                                   | 2 (5)                                                | 2 (13)                                                                        | 0                                                          | 0                                                     | 1 (14)                                                                |
| Hypokalemia                               | 2 (5)                                                | 0                                                                             | 1 (3)                                                      | 0                                                     | 0                                                                     |
| Dyspnea                                   | 2 (5)                                                | 0                                                                             | 1 (3)                                                      | 0                                                     | 0                                                                     |
| Decreased appetite                        | 2 (5)                                                | 0                                                                             | 0                                                          | 0                                                     | 1 (14)                                                                |
| Weight increased                          | 2 (5)                                                | 0                                                                             | 0                                                          | 0                                                     | 0                                                                     |
| Back pain                                 | 2 (5)                                                | 0                                                                             | 0                                                          | 0                                                     | 0                                                                     |
| Pulmonary embolism                        | 2 (5)                                                | 0                                                                             | 0                                                          | 0                                                     | 0                                                                     |
| Myalgia                                   | 1 (2)                                                | 1 (6)                                                                         | 0                                                          | 0                                                     | 0                                                                     |
| Pain in extremity                         | 1 (2)                                                | 1 (6)                                                                         | 0                                                          | 0                                                     | 0                                                                     |
| Vomiting                                  | 1 (2)                                                | 0                                                                             | 1 (3)                                                      | 1 (8)                                                 | 0                                                                     |
| Pneumonia                                 | 1 (2)                                                | 0                                                                             | 1 (3)                                                      | 1 (8)                                                 | 0                                                                     |
| Peripheral edema                          | 1 (2)                                                | 0                                                                             | 1 (3)                                                      | 1 (8)                                                 | 0                                                                     |
| Abdominal pain                            | 1 (2)                                                | 0                                                                             | 1 (3)                                                      | 0                                                     | 0                                                                     |
| Abdominal pain upper                      | 1 (2)                                                | 0                                                                             | 0                                                          | 0                                                     | 0                                                                     |
| Dehydration                               | 1 (2)                                                | 0                                                                             | 0                                                          | 0                                                     | 1 (14)                                                                |
| Anemia                                    | 1 (2)                                                | 0                                                                             | 0                                                          | 1 (8)                                                 | 0                                                                     |
| Neutropenia                               | 1 (2)                                                | 0                                                                             | 0                                                          | 0                                                     | 3 (43)                                                                |

|                                      |       |       |       |       |        |
|--------------------------------------|-------|-------|-------|-------|--------|
| Groin pain                           | 1 (2) | 0     | 0     | 0     | 0      |
| Ascites                              | 1 (2) | 0     | 0     | 0     | 0      |
| Edema                                | 1 (2) | 0     | 0     | 0     | 0      |
| Abscess limb                         | 1 (2) | 0     | 0     | 0     | 0      |
| Pneumonia                            | 1 (2) | 0     | 1 (3) | 1 (8) | 0      |
| Blood alkaline phosphatase increased | 1 (2) | 0     | 0     | 0     | 0      |
| Blood creatinine increased           | 1 (2) | 0     | 0     | 0     | 0      |
| Gamma glutamyltransferase increased  | 1 (2) | 0     | 0     | 0     | 0      |
| White blood cell count decreased     | 1 (2) | 0     | 0     | 0     | 0      |
| Dehydration                          | 1 (2) | 0     | 0     | 0     | 1 (14) |
| Hyperkalemia                         | 1 (2) | 0     | 0     | 0     | 0      |
| Posterior reversible encephalopathy  | 1 (2) | 0     | 0     | 0     | 0      |
| Dysuria                              | 1 (2) | 0     | 0     | 0     | 0      |
| Urinary tract obstruction            | 1 (2) | 0     | 0     | 0     | 0      |
| Pelvic pain                          | 1 (2) | 0     | 0     | 0     | 0      |
| Dysphonia                            | 1 (2) | 0     | 0     | 0     | 0      |
| Respiratory failure                  | 1 (2) | 0     | 0     | 0     | 0      |
| Lymphodema                           | 1 (2) | 0     | 0     | 0     | 0      |
| Hyponatremia                         | 0     | 1 (6) | 1 (3) | 0     | 1 (14) |
| Hypophosphatemia                     | 0     | 1 (6) | 0     | 0     | 0      |
| Osteomyelitis                        | 0     | 1 (6) | 0     | 0     | 0      |
| Tooth infection                      | 0     | 1 (6) | 0     | 0     | 0      |
| Aspartate aminotransferase           | 0     | 1 (6) | 0     | 0     | 0      |

|                              |   |       |       |       |   |
|------------------------------|---|-------|-------|-------|---|
| increased                    |   |       |       |       |   |
| Blood potassium increased    | 0 | 1 (6) | 0     | 0     | 0 |
| Failure to thrive            | 0 | 1 (6) | 0     | 0     | 0 |
| Hyperuricemia                | 0 | 1 (6) | 0     | 0     | 0 |
| Muscular weakness            | 0 | 1 (6) | 0     | 0     | 0 |
| Leukocytosis                 | 0 | 1 (6) | 0     | 0     | 0 |
| Nausea                       | 0 | 0     | 1 (3) | 1 (8) | 0 |
| Glioblastoma                 | 0 | 0     | 3 (8) | 0     | 0 |
| Aphasia                      | 0 | 0     | 2 (5) | 0     | 0 |
| Hemiparesis                  | 0 | 0     | 3 (8) | 0     | 0 |
| Seizure                      | 0 | 0     | 2 (5) | 0     | 0 |
| Proteinuria                  | 0 | 0     | 2 (5) | 0     | 0 |
| Female genital tract fistula | 0 | 0     | 2 (5) | 0     | 0 |
| Diarrhea                     | 0 | 0     | 1 (3) | 0     | 0 |
| Dysphagia                    | 0 | 0     | 1 (3) | 0     | 0 |
| Intestinal obstruction       | 0 | 0     | 1 (3) | 0     | 0 |
| Acute pancreatitis           | 0 | 0     | 1 (3) | 0     | 0 |
| Small intestinal obstruction | 0 | 0     | 1 (3) | 0     | 0 |
| Asthenia                     | 0 | 0     | 1 (3) | 0     | 0 |
| Medical device pain          | 0 | 0     | 1 (3) | 0     | 0 |
| Meningitis                   | 0 | 0     | 1 (3) | 0     | 0 |
| Limb injury                  | 0 | 0     | 1 (3) | 0     | 0 |
| Ataxia                       | 0 | 0     | 1 (3) | 0     | 0 |
| Cognitive disorder           | 0 | 0     | 1 (3) | 0     | 0 |
| Headache                     | 0 | 0     | 1 (3) | 0     | 0 |
| Memory impairment            | 0 | 0     | 1 (3) | 0     | 0 |
| Peripheral neuropathy        | 0 | 0     | 1 (3) | 0     | 0 |
| Urinary incontinence         | 0 | 0     | 1 (3) | 0     | 0 |
| Scrotal edema                | 0 | 0     | 1 (3) | 0     | 0 |

|                                       |   |   |       |       |        |
|---------------------------------------|---|---|-------|-------|--------|
| Chronic obstructive pulmonary disease | 0 | 0 | 1 (3) | 0     | 0      |
| Pneumothorax                          | 0 | 0 | 1 (3) | 0     | 0      |
| Insomnia                              | 0 | 0 | 1 (3) | 0     | 0      |
| Cardiac arrest                        | 0 | 0 | 0     | 1 (8) | 0      |
| Urinary tract infection               | 0 | 0 | 0     | 1 (8) | 0      |
| Decreased ejection fraction           | 0 | 0 | 0     | 1 (8) | 0      |
| Troponin increased                    | 0 | 0 | 0     | 1 (8) | 0      |
| Diabetes mellitus                     | 0 | 0 | 0     | 1 (8) | 0      |
| Dizziness                             | 0 | 0 | 0     | 1 (8) | 0      |
| Syncope                               | 0 | 0 | 0     | 1 (8) | 0      |
| Confusional state                     | 0 | 0 | 0     | 1 (8) | 0      |
| Acute respiratory failure             | 0 | 0 | 0     | 1 (8) | 0      |
| Pneumonitis                           | 0 | 0 | 0     | 1 (8) | 0      |
| Hematoma                              | 0 | 0 | 0     | 1 (8) | 0      |
| Nephrotic syndrome                    | 0 | 0 | 0     | 0     | 1 (14) |
| Infusion-related reaction             | 0 | 0 | 0     | 0     | 1 (14) |
| Anaphylactic reaction                 | 0 | 0 | 0     | 0     | 1 (14) |
| Drug hypersensitivity                 | 0 | 0 | 0     | 0     | 1 (14) |
| Leukopenia                            | 0 | 0 | 0     | 0     | 1 (14) |

**Supplementary Table 2. MEDI3617 pharmacokinetic parameters\***

| <b>Cohort</b>                    | <b>t<sub>½</sub><br/>(day)</b> | <b>C<sub>max</sub><br/>□g/mL</b> | <b>AUC<sub>0–last</sub><br/>(day·□g/mL)</b> | <b>AUC<sub>0–14d</sub><br/>(day·□g/mL)</b> | <b>AUC<sub>0–inf</sub><br/>(day·□g/mL)</b> | <b>CL<br/>(mL/day)</b> |
|----------------------------------|--------------------------------|----------------------------------|---------------------------------------------|--------------------------------------------|--------------------------------------------|------------------------|
| <b>Single-agent MEDI3617 Q3W</b> |                                |                                  |                                             |                                            |                                            |                        |
| 5 mg                             | 0.585 (NA)                     | 1.39 (0.254)                     | 1.3 (0.429)                                 | 1.79 (NA)                                  | 1.79 (NA)                                  | 2790 (NA)              |
| 10 mg                            | NA (NA)                        | 2.44 (NA)                        | 2.2 (NA)                                    | NA (NA)                                    | NA (NA)                                    | NA (NA)                |
| 20 mg                            | 1.26 (NA)                      | 6.63 (3.48)                      | 11.9 (11.8)                                 | 8.13 (NA)                                  | 8.12 (NA)                                  | 2460 (NA)              |
| 100 mg                           | 5.86 (NA)                      | 50.2 (28.8)                      | 171 (69)                                    | 203 (NA)                                   | 269 (NA)                                   | 423 (NA)               |
| 300 mg                           | 5.98 (3.09)                    | 82.4 (2.68)                      | 438 (204)                                   | 402 (130)                                  | 529 (269)                                  | 679 (345)              |
| 1000 mg                          | 7.68 (NA)                      | 239 (79.5)                       | 2610 (1570)                                 | 1560 (NA)                                  | 2150 (NA)                                  | 465 (NA)               |
| 1500 mg                          | 7.79 (NA)                      | 785 (189)                        | 3650 (2600)                                 | 2930 (NA)                                  | 4230 (NA)                                  | 355 (NA)               |
| <b>OC expansion</b>              |                                |                                  |                                             |                                            |                                            |                        |
| 1000 mg                          | 10.4 (3.15)                    | 336 (62.2)                       | 2610 (891)                                  | 1990 (637)                                 | 3280 (1410)                                | 352 (136)              |
| <b>OC expansion</b>              |                                |                                  |                                             |                                            |                                            |                        |
| 1500 mg                          | 9.03 (NA)                      | 346 (NA)                         | 2160 (NA)                                   | 1710 (NA)                                  | 2490 (NA)                                  | 603 (NA)               |
| <b>MEDI3617 plus bevacizumab</b> |                                |                                  |                                             |                                            |                                            |                        |
| 100 mg<br>Q3W                    | 3.59 (0.983)                   | 30.4 (26.8)                      | 101 (48.8)                                  | 101 (51.5)                                 | 110 (58.1)                                 | 1060 (426)             |
| 300 mg<br>Q3W                    | 9.67 (3.35)                    | 55.3 (12.6)                      | 473 (223)                                   | 380 (161)                                  | 628 (376)                                  | 614 (363)              |
| 1000 mg<br>Q3W                   | NA (NA)                        | 235 (90.5)                       | 2280 (529)                                  | NA (NA)                                    | NA (NA)                                    | NA (NA)                |
| 1500 mg<br>Q3W                   | 12.3 (NA)                      | 348 (54.6)                       | 2710 (1070)                                 | 2240 (NA)                                  | 3920 (NA)                                  | 388 (NA)               |

|                                                  |              |             |             |             |            |           |
|--------------------------------------------------|--------------|-------------|-------------|-------------|------------|-----------|
| 60 mg Q2W                                        | 3.9 (2.69)   | 44.5 (39.3) | 94.7 (48.7) | 94.8 (48.7) | 104 (61)   | 797 (499) |
| 200 mg                                           |              |             |             |             |            |           |
| Q2W                                              | 5.12 (0.541) | 47.5 (23.3) | 216 (61.8)  | 216 (61.5)  | 252 (83.2) | 847 (237) |
| 600 mg                                           |              |             |             |             |            |           |
| Q2W                                              | 8.23 (NA)    | 116 (35.1)  | 805 (292)   | 845 (NA)    | 1200 (NA)  | 501 (NA)  |
| 1000 mg                                          |              |             |             |             |            |           |
| Q2W                                              | 10.2 (NA)    | 275 (86.2)  | 2310 (941)  | 2870 (NA)   | 4630 (NA)  | 216 (NA)  |
| Glioma expansion                                 |              |             |             |             |            |           |
| 1000 mg                                          |              |             |             |             |            |           |
| Q2W                                              | NA (NA)      | 320 (170)   | 2590 (1920) | NA (NA)     | NA (NA)    | NA (NA)   |
| <b>MEDI3617 plus paclitaxel</b>                  |              |             |             |             |            |           |
| 600 mg                                           |              |             |             |             |            |           |
| Q2W                                              | 6.96 (1.59)  | 114 (22.5)  | 551 (331)   | 638 (62.6)  | 849 (163)  | 727 (157) |
| 1000 mg                                          |              |             |             |             |            |           |
| Q2W                                              | 9.34 (57.4)  | 209 (57.4)  | 1460 (484)  | 1830 (NA)   | 2810 (NA)  | 356 (NA)  |
| <b>MEDI3617 plus carboplatin plus paclitaxel</b> |              |             |             |             |            |           |
| 1000 mg                                          |              |             |             |             |            |           |
| Q3W                                              | 15.1 (NA)    | 200 (25.8)  | 1240 (882)  | 1230 (NA)   | 2240 (NA)  | 446 (NA)  |
| 1500 mg                                          |              |             |             |             |            |           |
| Q3W                                              | 11.1 (NA)    | 585 (491)   | 2890 (257)  | 2300 (NA)   | 3560 (NA)  | 424 (NA)  |

\*Values are mean (SD). AUC<sub>0-last</sub>, area under the plasma concentration-time curve from time 0 to the time of the last quantifiable concentration; AUC<sub>0-14d</sub>, area under the plasma concentration-time curve from time 0 to day 14 post-dose; AUC<sub>0-inf</sub>, area under the plasma concentration time curve from time 0 to infinity; CL, systemic clearance; C<sub>max</sub>, maximum observed serum concentration; N/A not applicable; Q2W, every 2 weeks; Q3W, every 3 weeks; SD, standard deviation; t<sub>1/2</sub>, half-life.

**Supplementary Table 3.** Treatment outcome: objective response and progression-free survival, by cohort

| Response,<br>n (%)       | MEDI3617 monotherapy |                                             | MEDI3617 plus bevacizumab   |                             |                                                             | MEDI3617 plus chemotherapy |                                            |
|--------------------------|----------------------|---------------------------------------------|-----------------------------|-----------------------------|-------------------------------------------------------------|----------------------------|--------------------------------------------|
|                          | Escalation<br>(n=25) | Expansion in<br>ovarian<br>cancer<br>(n=17) | Escalation<br>Q3W<br>(n=16) | Escalation<br>Q2W<br>(n=27) | Expansion Q2W<br>in recurrent<br>malignant glioma<br>(n=11) | Paclitaxel<br>(n=13)       | Carboplatin<br>plus<br>paclitaxel<br>(n=7) |
| CR + PR                  | 0                    | 1 (6)                                       | 1 (6)                       | 2 (7)                       | 0                                                           | 2 (15)                     | 0                                          |
| 95% CI                   | (0, 14)              | (0, 29)                                     | (0, 30)                     | (1, 24)                     | (0, 29)                                                     | (2, 45)                    | (0, 41)                                    |
| SD                       | 13 (52)              | 5 (30)                                      | 11 (69)                     | 10 (37)                     | 2 (18)                                                      | 4 (31)                     | 3 (43)                                     |
| PD                       | 11 (44)              | 9 (53)                                      | 2 (13)                      | 11 (41)                     | 6 (55)                                                      | 4 (31)                     | 3 (43)                                     |
| 95% CI                   | (31, 72)             | (14, 62)                                    | (48, 93)                    | (26, 65)                    | (2, 52)                                                     | (19, 75)                   | (10, 82)                                   |
| Median<br>PFS,<br>months | 1.4                  | 1.4                                         | 11.4                        | 2.0                         | 1.4                                                         | 3.5                        | NA                                         |
| 95% CI                   | 1.2, 2.6             | 1.1, 4.1                                    | 3.1, NA                     | 1.6, 4.4                    | 0.5, 1.4                                                    | 1.7, NA                    | 0, NA                                      |

CI, confidence interval; CR, complete response; DOR, duration of response; NA, not applicable; OR, objective response; PD, progressive disease; PFS, progression-free survival; PR, partial response; SD, stable disease; TTP, time to progression; TTR, time to response.
